# Supplementary material for: Reactive argon-plasma activation of screen-printed carbon electrodes for highly selective dopamine determination
Source: Royal Society of Chemistry journal article supplement (doi:10.1039/d2ay01154a), 2022-01-01
Supplement: d2ay01154a1.pdf [file d2ay01154a1.pdf]

1

## Supporting Information

### 2 **Reactive Argon Plasma Activation of Screen-Printed Carbon Electrodes for** 3 **Highly Selective Dopamine Determination**

4 Sarawut Cheunkar, <sup>a\*</sup> Sukunya Oaew, <sup>b</sup> Attasith Parnsubsakul, <sup>c</sup> Piyapong Asanithi <sup>d</sup>

5 <sup>a</sup> Division of Biotechnology, School of Bioresources and Technology, King Mongkut's University of Technology  
6 Thonburi, Bangkok 10150, Thailand

7 <sup>b</sup> Biochemical Engineering and Systems Biology Research Group, National Center for Genetic Engineering and  
8 Biotechnology, National Science and Technology Development Agency, King Mongkut's University of Technology  
9 Thonburi, Bangkok 10150, Thailand

10 <sup>c</sup> Sensor Research Unit (SRU), Department of Chemistry, Faculty of Science, Chulalongkorn University, 254 Phaya  
11 Thai Road, Pathum Wan, Bangkok 10330, Thailand

12 <sup>d</sup> Department of Physics, Faculty of Science, King Mongkut's University of Technology Thonburi, Bangkok 10150,  
13 Thailand

14 \* e-mail: sarawut.che@kmutt.ac.th, [sarawut.che@mail.kmutt.ac.th](mailto:sarawut.che@mail.kmutt.ac.th)

15

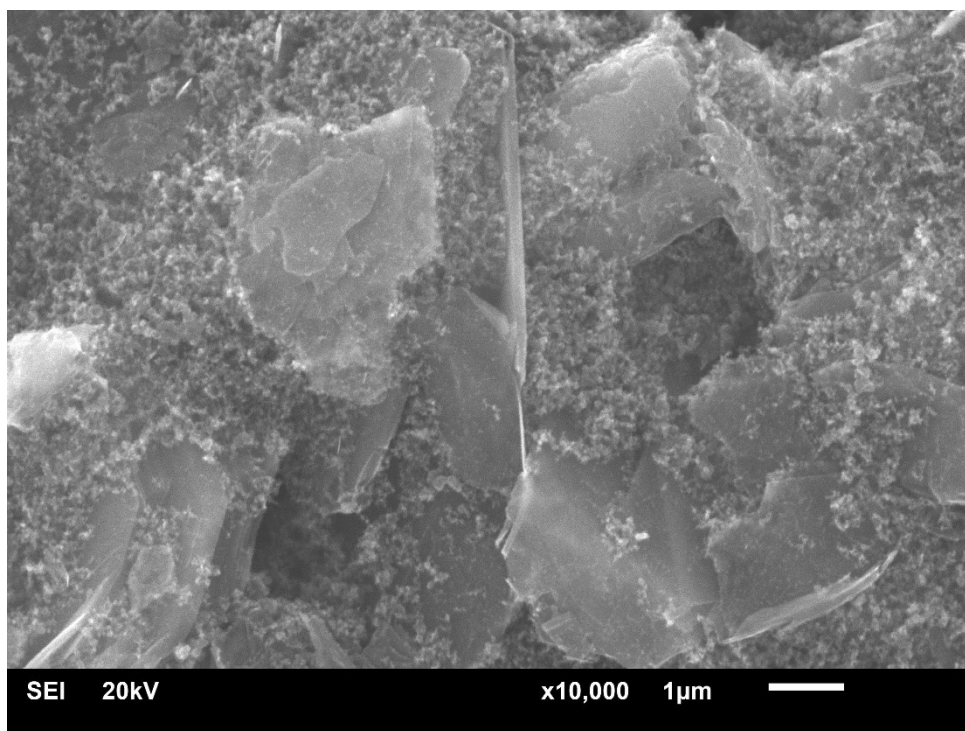

16

17 Fig. S1 Scanning electron micrograph of SPCEs after Ar plasma treatment at 50 w for 15 min. Carbon  
18 additives were more removed from the surface.

19

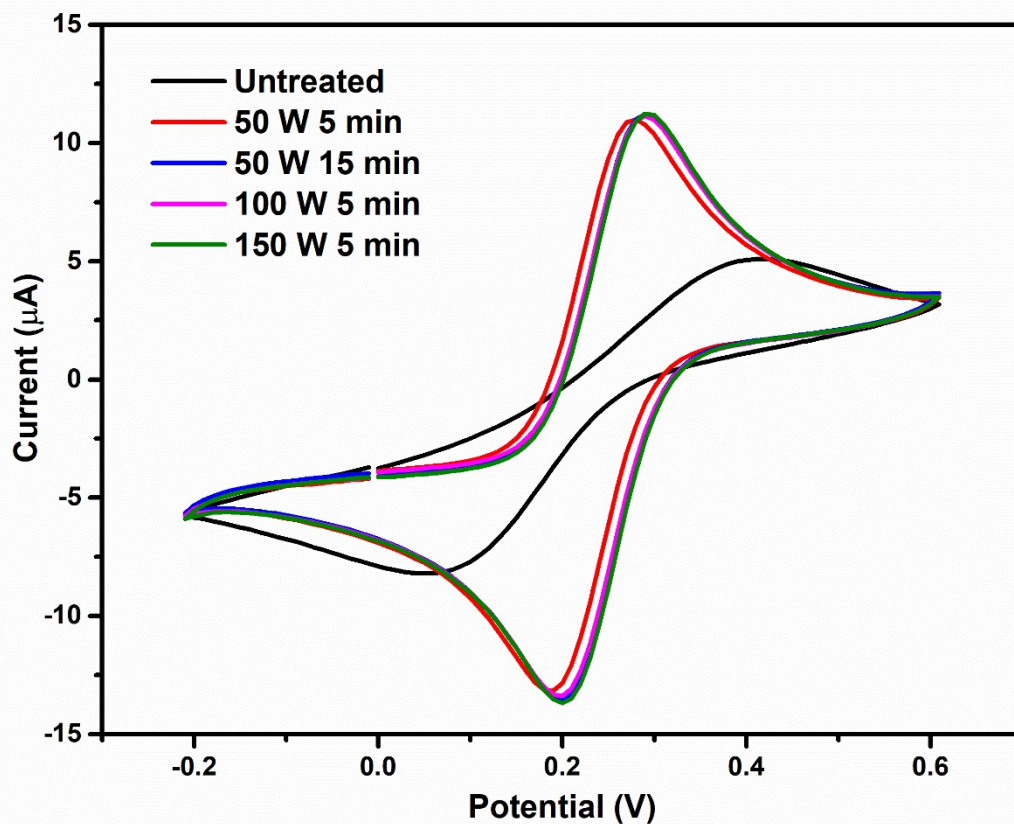

20 Fig. S2 Cyclic voltammograms of 5 mM ferricyanide in 1 M KCl at the scan rate of 50 mV/s using SPCs  
21 treated with argon plasma at different conditions, untreated (black), 50 W 5 min (red), 50 W 15 min (blue),  
22 100 W 5 min (pink), and 150 W 5 min (green).

23

24

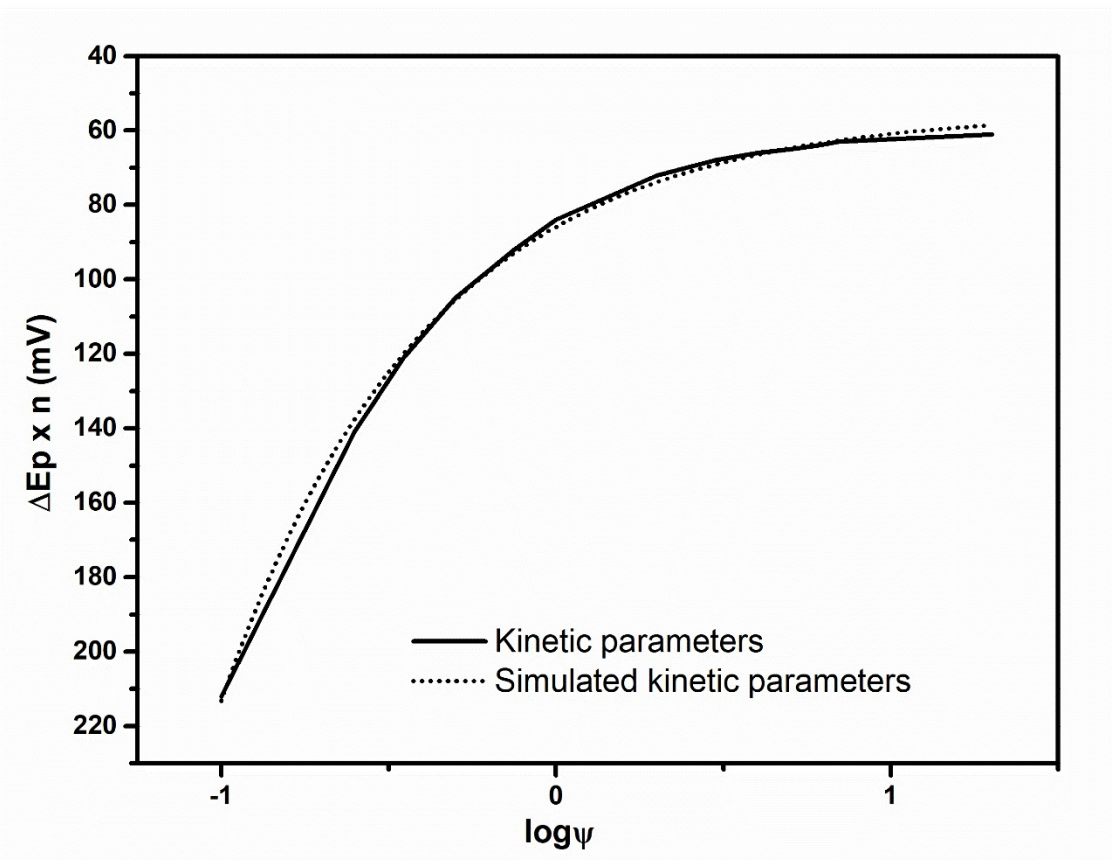

25 Fig. S3 Relation of peak potential separation with dimensionless kinetic parameters

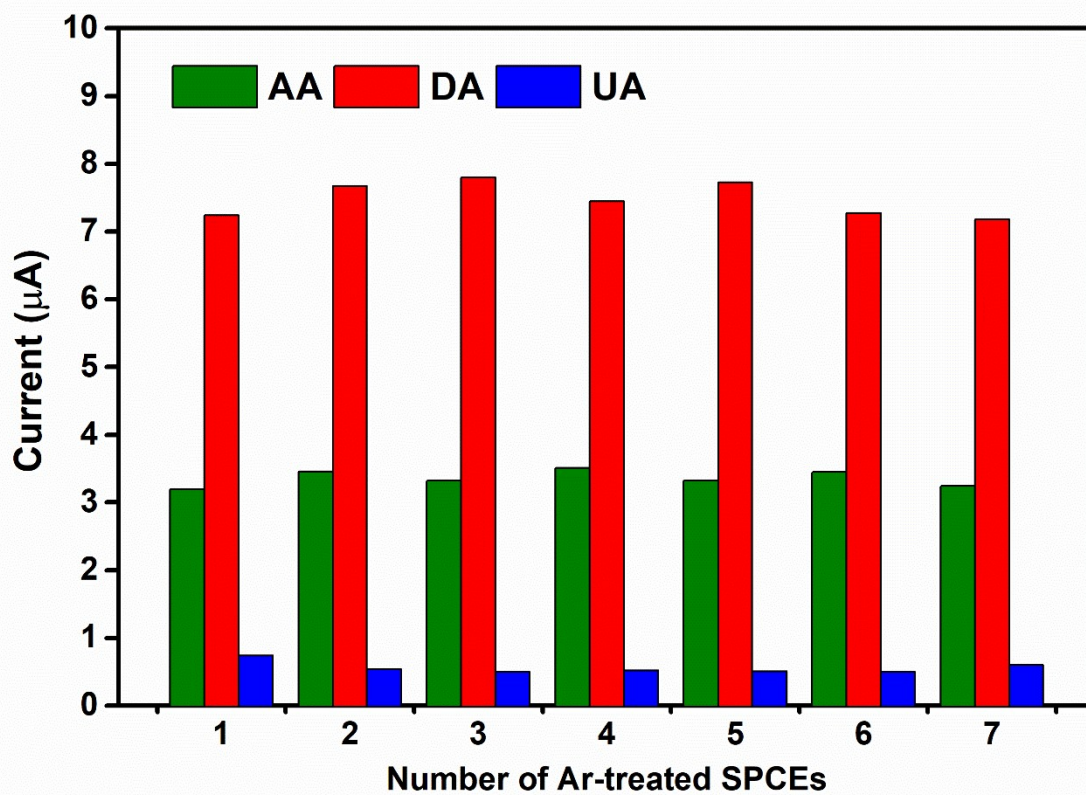

27 Fig S4. The reproducibility results of Ar-treated SPCEs (n=7) using DPV of a mixture of 100 μM AA, 10  
28 μM DA, and 5 μM UA in 0.1 M PBS (pH 7.4)

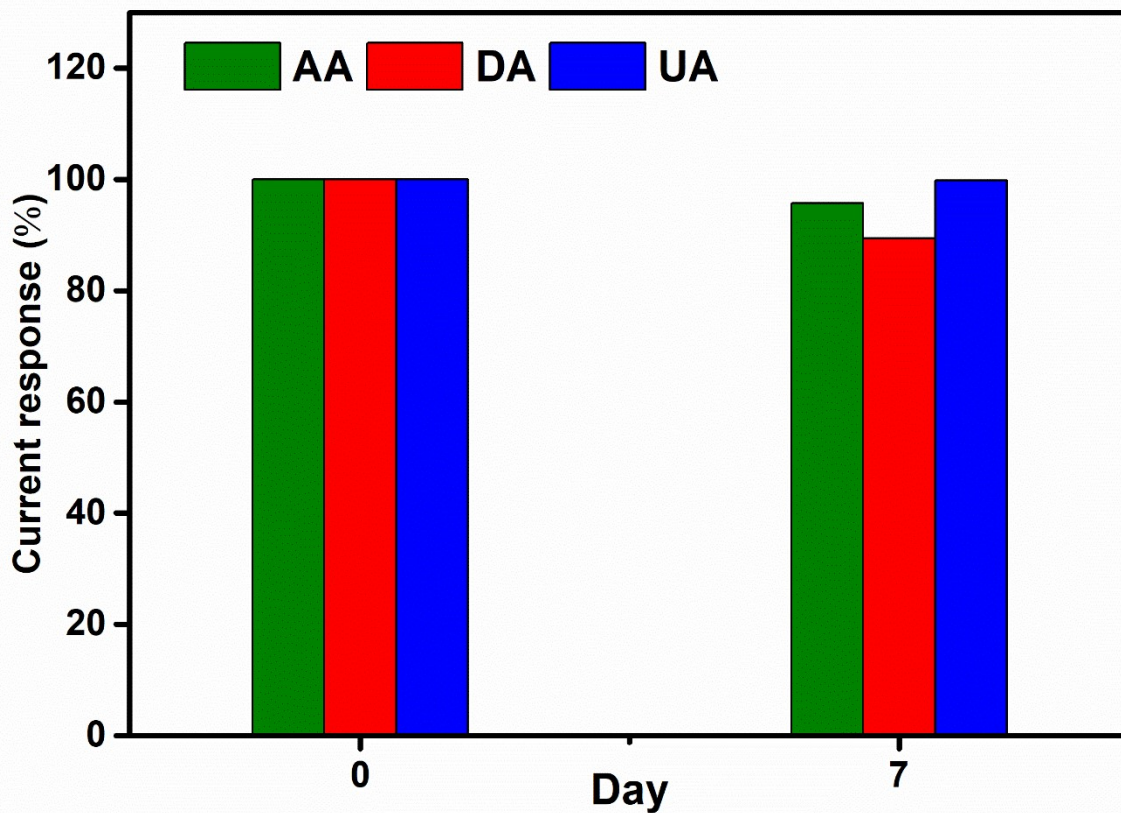

30 Fig S5. The stability tests of Ar-treated SPCEs (n=7) stored in a dessicated chamber for 7 days using DPV  
31 of a mixture of 100  $\mu$ M AA, 10  $\mu$ M DA, and 5  $\mu$ M UA in 0.1 M PBS (pH 7.4)

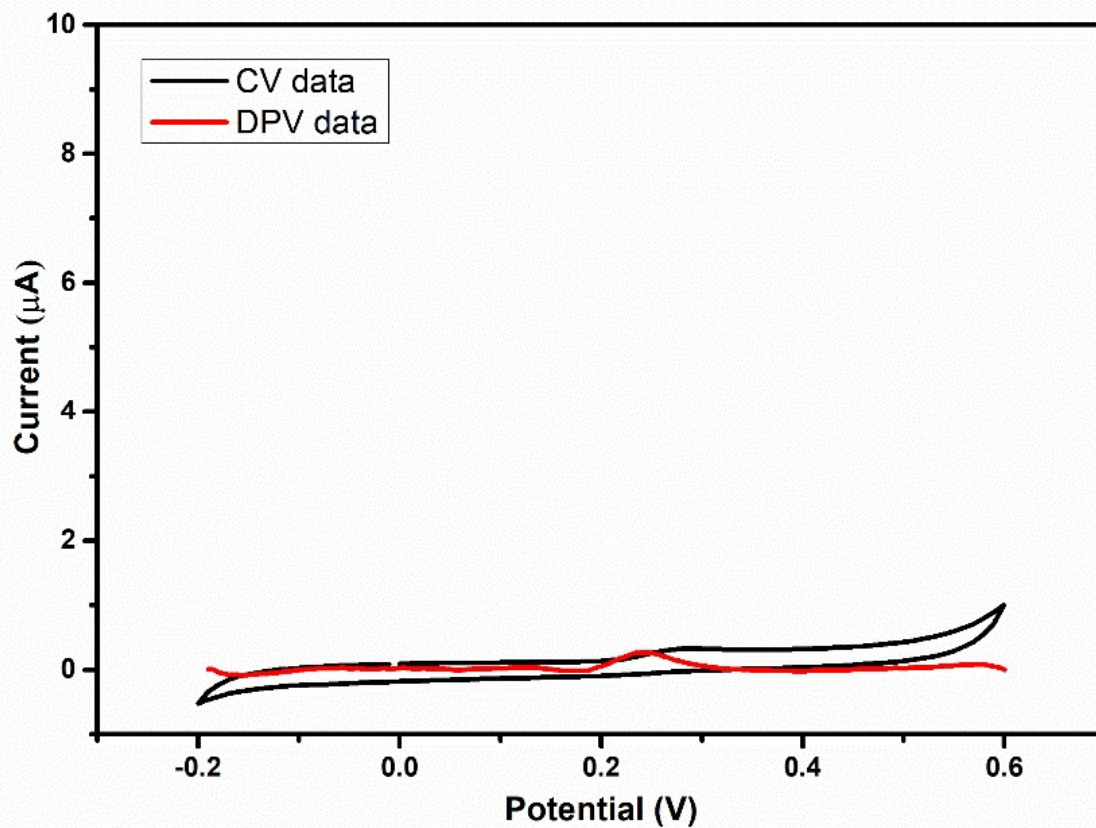

33 Fig S6. The CV (black) and DPV (red) data of human serum diluted 100 times in 0.1 M PBS (pH 7.4)

34

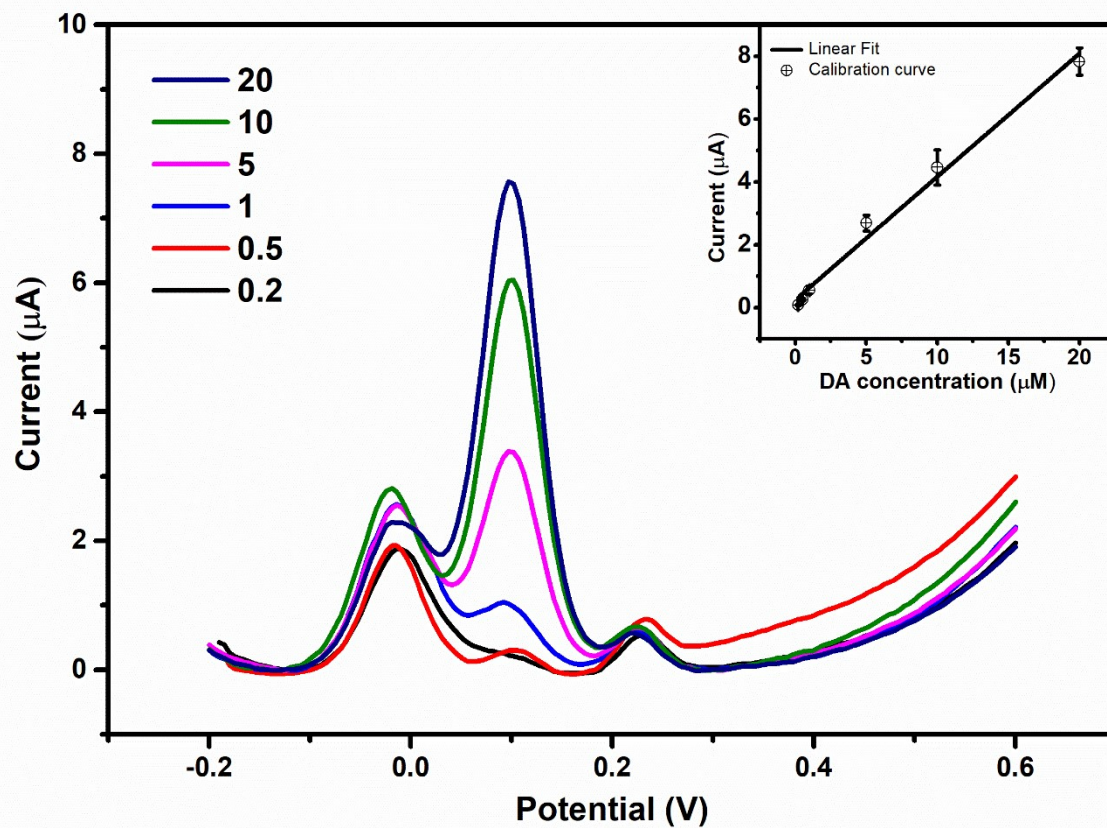

35 Fig S7. DPV of DA at different concentrations (0.2, 0.5, 1, 5, 10, and 20 μM) on Ar-treated SPCEs in the  
36 presence of 100 μM AA and 5 μM UA in diluted human serum. The inset displays the calibration curve for  
37 real sample analysis.
